# Supplementary material for: A simple “turn-on” fluorescent biosensor for sensitive detection of exonuclease III activity through photoinduced electron transfer and self-hybridization of a DNA probe
Source: Royal Society of Chemistry journal article supplement (doi:10.1039/c8ay00631h), 2018-01-01
Supplement: c8ay00631h1.pdf [file c8ay00631h1.pdf]

## Support information

### **Simple “turn-on” fluorescent biosensor for sensitive detection of exonuclease III activity through photoinduced electron transfer and self-hybridization of one DNA probe**

Qiang Liu,<sup>a</sup> Jinyu Lian,<sup>a</sup> Mei Liu,<sup>b</sup> Yan Jin<sup>a</sup> and Baoxin Li<sup>a,\*</sup>

<sup>a</sup>School of Chemistry & Chemical Engineering, Key Laboratory of Analytical Chemistry for Life Science of Shaanxi Province, Shaanxi Normal University, Xi'an 710062, China

<sup>b</sup>College of Food Engineering and Nutritional Science, Shaanxi Normal University, Xi'an 710062, China

\*Fax: +86-29-81530727. E-mail: libaoxin@snnu.edu.cn

**Table S1** Sequences of the used oligonucleotides

| Name                    | Sequence                                             | Length (bp) | T <sub>m</sub> (°C) |
|-------------------------|------------------------------------------------------|-------------|---------------------|
| ds(CG-GC) <sub>6</sub>  | 5'-CGCGCG-FAM-3'<br>3'-FAM-GCGCGC-5'                 | 6           | 20.0                |
| ds(CG-GC) <sub>8</sub>  | 5'-CGCGCGCG-FAM-3'<br>3'-FAM-CGCGCGCG-5'             | 8           | 40.8                |
| ds(CG-GC) <sub>10</sub> | 5'-CGCGCGCGCG-FAM-3'<br>3'-FAM-GCGCGCGCGC-5'         | 10          | 53.3                |
| ds(CG-GC) <sub>12</sub> | 5'-CGCGCGCGCGCG-FAM-3'<br>3'-FAM-GCGCGCGCGCGC-5'     | 12          | 61.6                |
| ds(CG-GC) <sub>14</sub> | 5'-CGCGCGCGCGCGCG-FAM-3'<br>3'-FAM-GCGCGCGCGCGCGC-5' | 14          | 67.6                |

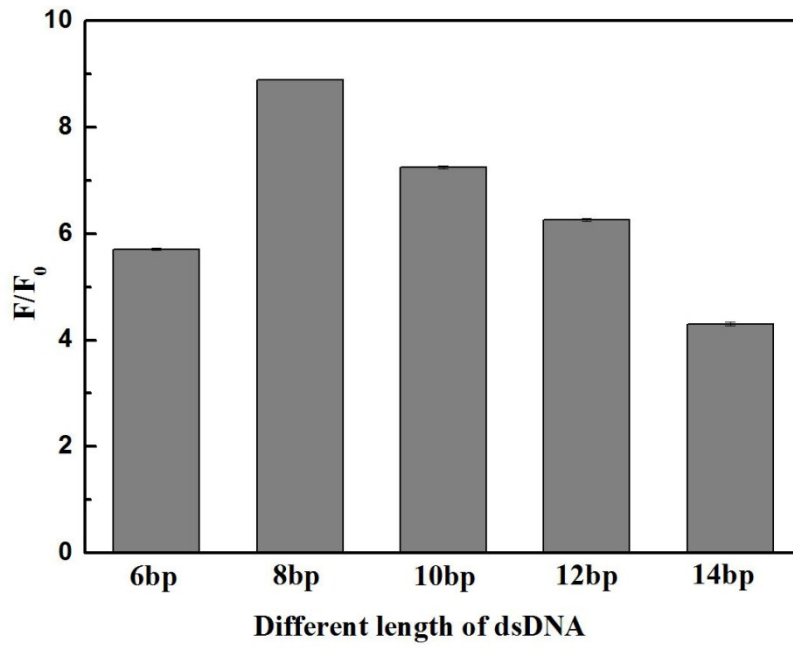

**Figure S1.** Effect of the length of dsDNA on the sensing system.

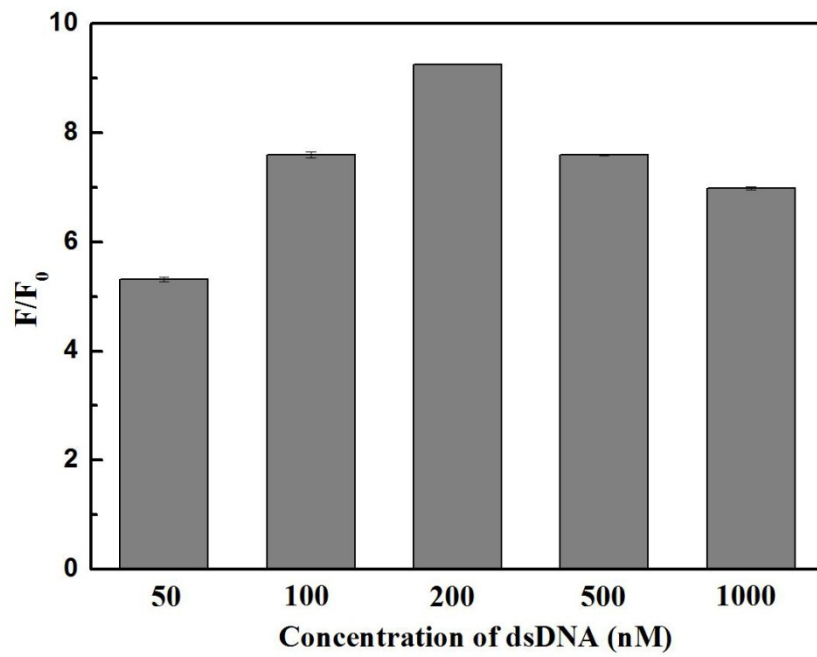

**Figure S2.** Effect of dsDNA concentration of on the sensing system.

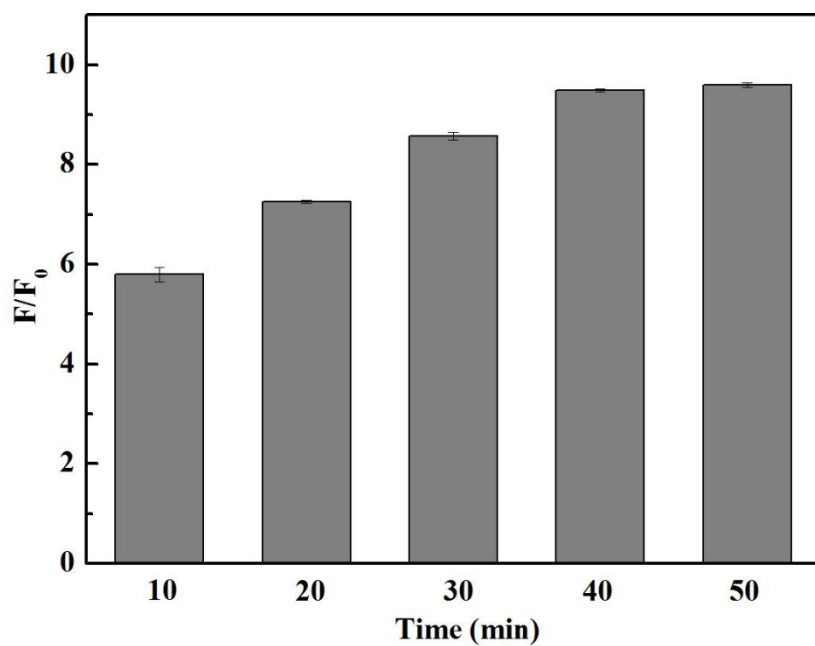

**Figure S3.** Effect of dsDNA and Exo III reaction time on the sensing system.

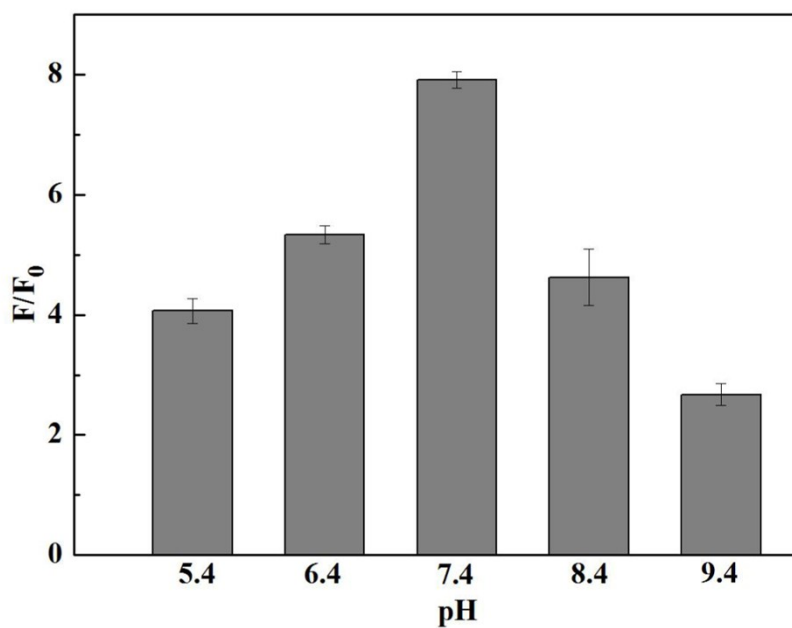

**Figure S4.** Effect of pH on the sensing system. Experimental condition: 60  $\mu$ L dsDNA (0.20  $\mu$ M), 60  $\mu$ L Exo III (5 U/mL), 40 min reaction time.
